# Supplementary material for: Water Stress Alters Morphophysiological, Grain Quality and Vegetation Indices of Soybean Cultivars
Source: MDPI journal article supplement (doi:10.3390/plants11040559), 2022-02-21
Supplement: s1 [file s1]

**Table S1.** Mean values of vegetation indices, gas exchange and photosystem II maximum quantum yield in six soybean cultivars under four water regimes from 2018 and 2019.

| Cultivars       | WR  | Variables |      |      |       |      |       |       |      |      |      |                |       |     |       |      |
|-----------------|-----|-----------|------|------|-------|------|-------|-------|------|------|------|----------------|-------|-----|-------|------|
|                 |     | NDVI      | SAVI | DVI  | GNDVI | NDRE | TCARI | OSAVI | TO   | PRI  | A    | g <sub>s</sub> | iWUE  | E   | Fv/Fm | CI   |
| BRS<br>5980IPRO | 31  | 0.34      | 0.23 | 0.14 | 0.55  | 0.14 | 0.16  | 0.28  | 0.64 | 0.30 | 4.5  | 0.05           | 90.7  | 2.1 | 0.79  | 232  |
|                 | 44  | 0.41      | 0.27 | 0.17 | 0.58  | 0.18 | 0.17  | 0.34  | 0.58 | 0.32 | 10.0 | 0.11           | 90.9  | 2.6 | 0.78  | 216  |
|                 | 64  | 0.46      | 0.31 | 0.19 | 0.60  | 0.20 | 0.19  | 0.38  | 0.51 | 0.32 | 17.8 | 0.36           | 49.4  | 5.3 | 0.81  | 261  |
|                 | 100 | 0.51      | 0.34 | 0.20 | 0.61  | 0.22 | 0.21  | 0.42  | 0.58 | 0.33 | 19.7 | 0.35           | 56.3  | 5.0 | 0.81  | 256  |
| BRS<br>7180IPRO | 31  | 0.42      | 0.30 | 0.19 | 0.58  | 0.19 | 0.18  | 0.35  | 0.66 | 0.33 | 3.7  | 0.06           | 61.7  | 2.6 | 0.75  | 241  |
|                 | 44  | 0.49      | 0.36 | 0.24 | 0.61  | 0.23 | 0.21  | 0.43  | 0.61 | 0.35 | 10.9 | 0.18           | 60.6  | 3.5 | 0.78  | 226  |
|                 | 64  | 0.57      | 0.41 | 0.27 | 0.62  | 0.25 | 0.26  | 0.49  | 0.55 | 0.35 | 18.3 | 0.33           | 55.5  | 5.3 | 0.80  | 249  |
|                 | 100 | 0.76      | 0.53 | 0.34 | 0.69  | 0.31 | 0.33  | 0.64  | 0.52 | 0.34 | 19.9 | 0.36           | 55.3  | 5.1 | 0.82  | 254  |
| BRS<br>7280RR   | 31  | 0.39      | 0.26 | 0.16 | 0.58  | 0.16 | 0.17  | 0.32  | 0.63 | 0.30 | 10.0 | 0.07           | 142.9 | 2.3 | 0.79  | 184  |
|                 | 44  | 0.44      | 0.30 | 0.19 | 0.60  | 0.20 | 0.18  | 0.37  | 0.58 | 0.34 | 15.3 | 0.15           | 102.0 | 3.2 | 0.80  | 204  |
|                 | 64  | 0.50      | 0.35 | 0.22 | 0.61  | 0.22 | 0.22  | 0.43  | 0.53 | 0.33 | 20.7 | 0.33           | 62.7  | 5.2 | 0.82  | 248  |
|                 | 100 | 0.56      | 0.38 | 0.23 | 0.62  | 0.23 | 0.25  | 0.47  | 0.58 | 0.32 | 21.2 | 0.35           | 60.6  | 5.2 | 0.83  | 251  |
| BRS<br>7380RR   | 31  | 0.37      | 0.26 | 0.16 | 0.55  | 0.17 | 0.17  | 0.31  | 0.68 | 0.31 | 5.3  | 0.10           | 53.0  | 2.4 | 0.78  | 188  |
|                 | 44  | 0.44      | 0.31 | 0.20 | 0.58  | 0.20 | 0.19  | 0.38  | 0.64 | 0.35 | 12.7 | 0.17           | 74.7  | 3.5 | 0.80  | 217  |
|                 | 64  | 0.48      | 0.34 | 0.22 | 0.59  | 0.21 | 0.22  | 0.41  | 0.57 | 0.34 | 18.8 | 0.33           | 57.0  | 5.1 | 0.80  | 257  |
|                 | 100 | 0.64      | 0.44 | 0.28 | 0.61  | 0.24 | 0.32  | 0.54  | 0.65 | 0.34 | 20.7 | 0.36           | 57.5  | 5.1 | 0.81  | 250  |
| M<br>6410IPRO   | 31  | 0.39      | 0.26 | 0.16 | 0.56  | 0.17 | 0.16  | 0.33  | 0.61 | 0.30 | 6.9  | 0.07           | 98.6  | 2.2 | 0.78  | 283  |
|                 | 44  | 0.45      | 0.30 | 0.19 | 0.60  | 0.22 | 0.17  | 0.37  | 0.56 | 0.34 | 13.9 | 0.18           | 77.2  | 2.9 | 0.79  | 216  |
|                 | 64  | 0.49      | 0.34 | 0.21 | 0.61  | 0.23 | 0.19  | 0.41  | 0.50 | 0.34 | 19.0 | 0.29           | 65.5  | 4.6 | 0.82  | 256  |
|                 | 100 | 0.55      | 0.38 | 0.23 | 0.63  | 0.25 | 0.22  | 0.46  | 0.56 | 0.34 | 20.9 | 0.36           | 58.1  | 5.2 | 0.82  | 251  |
| NA<br>5909GR    | 31  | 0.34      | 0.22 | 0.13 | 0.56  | 0.15 | 0.15  | 0.28  | 0.60 | 0.29 | 7.2  | 0.06           | 120.0 | 3.6 | 0.80  | 233  |
|                 | 44  | 0.41      | 0.27 | 0.16 | 0.59  | 0.19 | 0.16  | 0.34  | 0.56 | 0.33 | 14.0 | 0.15           | 93.3  | 3.2 | 0.82  | 222  |
|                 | 64  | 0.48      | 0.32 | 0.19 | 0.61  | 0.21 | 0.20  | 0.39  | 0.54 | 0.34 | 20.4 | 0.31           | 65.8  | 4.7 | 0.83  | 251  |
|                 | 100 | 0.53      | 0.35 | 0.21 | 0.63  | 0.23 | 0.21  | 0.43  | 0.55 | 0.34 | 21.1 | 0.36           | 58.6  | 5.2 | 0.84  | 255  |
| Mean            |     | 0.33      | 0.20 | 0.60 | 0.21  | 0.20 | 0.40  | 0.58  | 0.33 | 4.0  | 15.9 | 0.22           | 72.2  | 4.0 | 0.80  | 237  |
| SE              |     | 0.02      | 0.01 | 0.01 | 0.01  | 0.01 | 0.01  | 0.02  | 0.01 | 0.01 | 0.68 | 0.03           | 0.22  | 0.2 | 0.01  | 4.94 |
| CV              |     | 2.03      | 2.13 | 2.29 | 0.52  | 1.84 | 2.33  | 2.07  | 0.84 | 0.52 | 1.86 | 5.67           | 3.2   | 3.0 | 2.19  | 1.02 |

WR: water regimes (31, 44, 64 and 100% CET replacement - WR1, WR2, WR3, and WR4 respectively); NDVI: Difference Vegetation Index; SAVI: Soil Adjusted Vegetation Index; DVI: Difference Vegetation Index; GNDVI: Green Normalized Difference Vegetation Index; NDRE: Red Edge Normalized Difference; TCARI: The Transformed Chlorophyll Absorption and Reflectance Index; OSAVI: Optimized Soil Adjusted Vegetation Index; TO: TCARI/OSAVI Ratio; PRI: Photochemical Reflectance Index; A: net assimilation of CO<sub>2</sub> (μmol CO<sub>2</sub> m<sup>-2</sup> s<sup>-1</sup>); g<sub>s</sub>: stomatal conductance (μmol H<sub>2</sub>O m<sup>-2</sup> s<sup>-1</sup>); iWUE: intrinsic water use efficiency [A: net assimilation of CO<sub>2</sub> (μmol CO<sub>2</sub> m<sup>-2</sup> s<sup>-1</sup>)/g<sub>s</sub>: stomatal conductance (μmol H<sub>2</sub>O m<sup>-2</sup> s<sup>-1</sup>)]; E: transpiration (mmol H<sub>2</sub>O m<sup>-2</sup> s<sup>-1</sup>); Fv/Fm: photosystem II Maximum Quantum Yield; CI: Internal Carbon Concentration; SE: standard error; CV: coefficient of variation (%).
