# Supplementary material for: Water Stress Alters Morphophysiological, Grain Quality and Vegetation Indices of Soybean Cultivars
Source: MDPI journal article supplement (doi:10.3390/plants11040559), 2022-02-21
Supplement: s1 [file s1]

**Table S2.** Mean values of morphological evaluations, grain quality and yield in six soybean cultivars under four water regimes from 2018 and 2019.

| Cultivars   | WR  | Variables |      |      |       |      |      |      |       |       |        |      |       |      |      |      |
|-------------|-----|-----------|------|------|-------|------|------|------|-------|-------|--------|------|-------|------|------|------|
|             |     | A1        | PH   | SD   | NK    | PP   | GP   | GM   | HW    | MTG   | GY     | G    | WUE   | O    | P    | D    |
| BRS5980IPRO | 31  | 1.03      | 25.8 | 4.7  | 10.1  | 18.9 | 2.06 | 10.0 | 63.10 | 142.8 | 2338   | 73.3 | 11.20 | 19.1 | 39.5 | 23.0 |
|             | 44  | 0.96      | 28.4 | 4.9  | 11.6  | 26.3 | 2.01 | 11.1 | 65.78 | 141.9 | 2782   | 92.6 | 8.82  | 19.1 | 39.6 | 2.2  |
|             | 64  | 0.83      | 29.3 | 5.0  | 11.5  | 32.4 | 2.10 | 11.8 | 63.15 | 141.8 | 3271   | 92.3 | 7.20  | 19.0 | 39.0 | 1.0  |
|             | 100 | 0.84      | 30.1 | 5.2  | 12.1  | 36.1 | 2.08 | 11.8 | 64.33 | 151.4 | 3351   | 93.3 | 4.85  | 19.6 | 38.8 | 0.3  |
| BRS7180IPRO | 31  | 1.16      | 35.4 | 2.7  | 9.9   | 22.2 | 1.98 | 11.6 | 61.00 | 134.0 | 2419   | 88.6 | 9.83  | 21.4 | 38.7 | 5.5  |
|             | 44  | 0.98      | 38.8 | 5.9  | 12.2  | 29.8 | 2.10 | 10.7 | 63.24 | 152.2 | 3026   | 82.0 | 7.05  | 19.7 | 38.5 | 2.3  |
|             | 64  | 1.01      | 38.9 | 6.4  | 11.6  | 34.3 | 2.26 | 11.5 | 64.70 | 162.3 | 3305   | 69.0 | 5.45  | 20.4 | 37.3 | 4.7  |
|             | 100 | 0.90      | 42.2 | 6.3  | 11.2  | 39.5 | 2.09 | 13.5 | 63.07 | 168.5 | 3431   | 54.0 | 4.08  | 21.3 | 37.0 | 0.2  |
| BRS7280RR   | 31  | 1.13      | 39.9 | 6.0  | 11.3  | 19.3 | 2.08 | 10.4 | 64.70 | 178.1 | 3117   | 86.0 | 12.03 | 20.3 | 40.4 | 6.2  |
|             | 44  | 1.07      | 36.1 | 6.0  | 10.9  | 28.7 | 2.17 | 11.0 | 63.10 | 180.2 | 3628   | 92.0 | 8.82  | 20.7 | 39.1 | 2.2  |
|             | 64  | 1.13      | 43.5 | 5.6  | 14.5  | 26.5 | 2.28 | 11.1 | 63.80 | 203.1 | 4312   | 87.3 | 7.28  | 19.6 | 39.8 | 0.0  |
|             | 100 | 1.04      | 41.5 | 5.5  | 11.8  | 29.7 | 2.13 | 11.1 | 63.72 | 212.8 | 4342   | 87.0 | 4.86  | 21.0 | 38.9 | 0.7  |
| BRS7380RR   | 31  | 1.06      | 32.5 | 5.1  | 11.6  | 21.2 | 2.18 | 11.5 | 61.10 | 133.2 | 2527   | 93.6 | 10.48 | 19.9 | 39.7 | 0.7  |
|             | 44  | 0.93      | 35.5 | 5.5  | 12.8  | 30.6 | 2.18 | 11.7 | 61.07 | 141.3 | 3052   | 91.3 | 7.90  | 21.3 | 38.0 | 0.2  |
|             | 64  | 0.96      | 37.4 | 5.6  | 13.1  | 36.2 | 2.20 | 11.9 | 62.32 | 158.0 | 3474   | 83.3 | 5.96  | 22.1 | 38.0 | 0.0  |
|             | 100 | 0.95      | 37.4 | 5.8  | 13.9  | 47.6 | 2.16 | 11.9 | 62.00 | 173.7 | 3751   | 87.3 | 4.36  | 22.1 | 37.6 | 0.0  |
| M6410IPRO   | 31  | 0.99      | 32.0 | 4.9  | 11.1  | 17.6 | 2.09 | 10.8 | 62.02 | 139.1 | 2604   | 83.3 | 10.91 | 20.6 | 40.3 | 14.5 |
|             | 44  | 0.94      | 32.1 | 4.9  | 11.1  | 23.0 | 2.25 | 11.2 | 62.32 | 148.1 | 3286   | 95.6 | 8.48  | 20.8 | 38.9 | 1.2  |
|             | 64  | 0.95      | 34.3 | 5.1  | 12.4  | 30.8 | 2.22 | 11.8 | 61.60 | 165.4 | 3544   | 90.0 | 6.18  | 22.9 | 36.7 | 0.0  |
|             | 100 | 0.88      | 35.2 | 5.0  | 12.0  | 33.2 | 2.08 | 11.8 | 63.98 | 183.3 | 4013   | 86.0 | 4.40  | 22.6 | 36.3 | 0.0  |
| NA5909GR    | 31  | 0.91      | 25.5 | 6.7  | 10.6  | 19.9 | 2.05 | 10.1 | 62.83 | 169.7 | 2910   | 76.0 | 11.66 | 21.9 | 37.5 | 19.8 |
|             | 44  | 0.85      | 28.2 | 5.7  | 11.0  | 27.4 | 1.86 | 11.3 | 63.93 | 167.6 | 3419   | 94.6 | 8.52  | 21.1 | 37.9 | 1.5  |
|             | 64  | 0.87      | 30.0 | 5.6  | 12.1  | 29.9 | 1.87 | 11.5 | 63.73 | 192.5 | 4055   | 90.3 | 6.82  | 21.4 | 37.5 | 0.2  |
|             | 100 | 0.81      | 31.6 | 6.1  | 12.6  | 41.1 | 1.82 | 11.4 | 65.95 | 205.4 | 4261   | 88.6 | 4.82  | 21.8 | 37.5 | 1.8  |
| Mean        |     | 0.96      | 34.2 | 6.7  | 11.80 | 29.3 | 2.10 | 11.3 | 63.19 | 164.4 | 3342   | 85.7 | 7.40  | 20.8 | 38.4 | 38.4 |
| SE          |     | 0.02      | 1.04 | 0.93 | 0.22  | 1.56 | 0.02 | 0.15 | 0.28  | 4.75  | 119.46 | 1.94 | 1.02  | 0.23 | 0.23 | 0.23 |
| CV          |     | 1.01      | 1.49 | 6.76 | 0.92  | 2.60 | 0.58 | 0.63 | 0.22  | 1.41  | 1.75   | 1.11 | 3.48  | 0.54 | 0.30 | 0.30 |

WR: water regimes (31, 44, 64 and 100% CET replacement - WR1, WR2, WR3, and WR4 respectively); A1: height of first pod set (cm); PH: plant height (cm); SD: stem diameter (mm); NK: number of knots; PP: number of pods; GP: grains per pod; GM: grain moisture (%); HW: hectoliter weight; MTG: mass of thousand grains (g); GY: grain yield (kg ha<sup>-1</sup>); G: germination (%); WUE: water use efficiency; O: oil (%); P: protein (%); D: hard seeds (%); SE: standard error; CV: coefficient of variation (%).
